# Supplementary material
Source: PubMed Central journal article supplement (PMC2922548)
Supplement: 0912701107_pnas.200912701SI.pdf [file 0912701107_pnas.200912701SI.pdf]

# Supporting Information

Godwin et al. 10.1073/pnas.0912701107

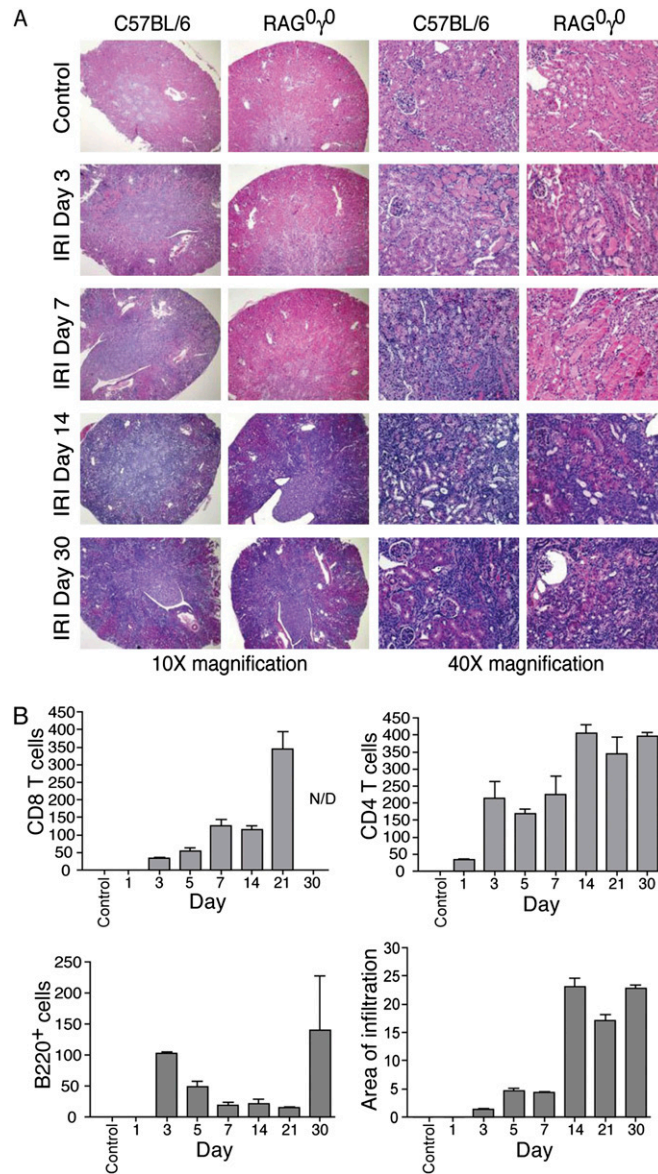

**Fig. S1.** Characterization of renal IRI in C57BL/6J and R<sub>0</sub>/C<sub>0</sub> mice. (A) H&E-stained sections used for miRNA expression analysis. Images are representative of three independent experiments. (B) Quantitation of lymphocytic infiltration in C57BL/6J kidneys following IRI.

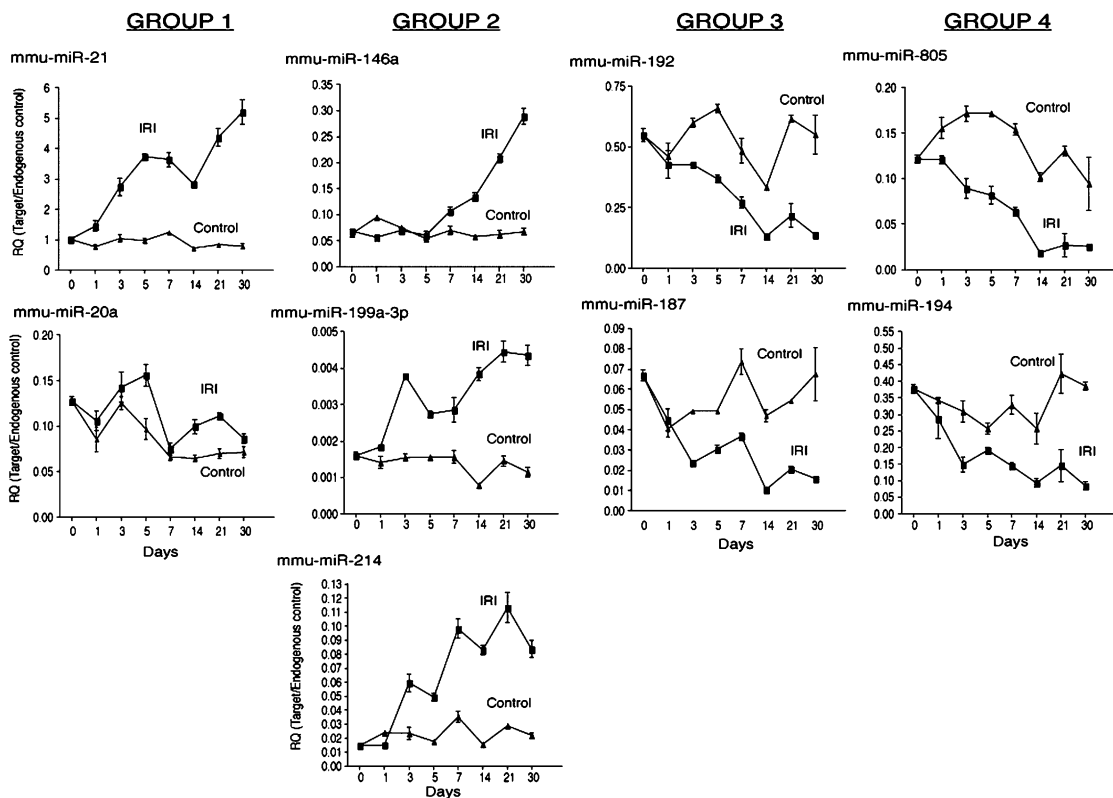

**Fig. S2.** Real-time PCR analysis in C57BL/6J mice following IRI. The expression of miR-21, miR-20a, miR-146a, miR-199a-3p, miR-214, miR-192, miR-187, miR-805, and miR-194 were analyzed over a 30-d time course by real-time PCR. Experiments were performed with different samples than those used in the miRNA microarray from Fig. 1.

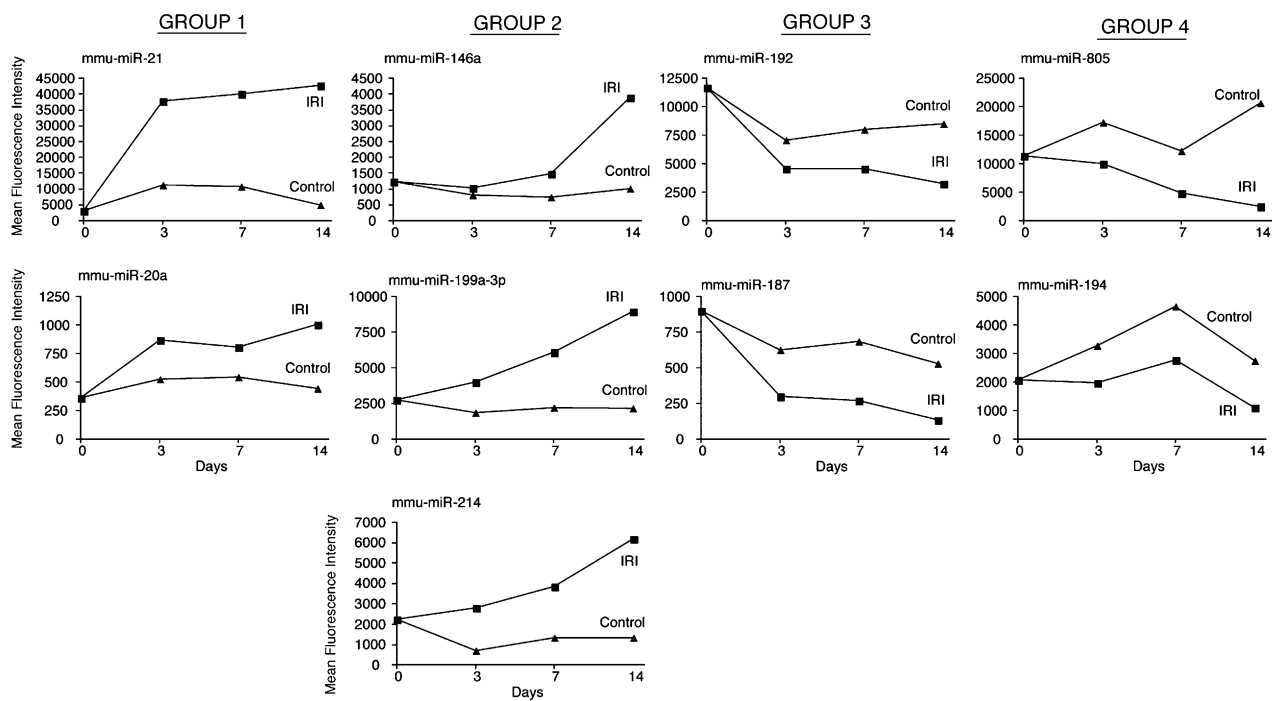

**Fig. S3.** miRNA microarray analysis in C57BL/6J mice following IRI. The expression of miR-21, miR-20a, miR-146a, miR-199a-3p, miR-214, miR-192, miR-187, miR-805, and miR-194 were analyzed over a 14-d time course by miRNA microarray in a second set of C57BL/6J mice.

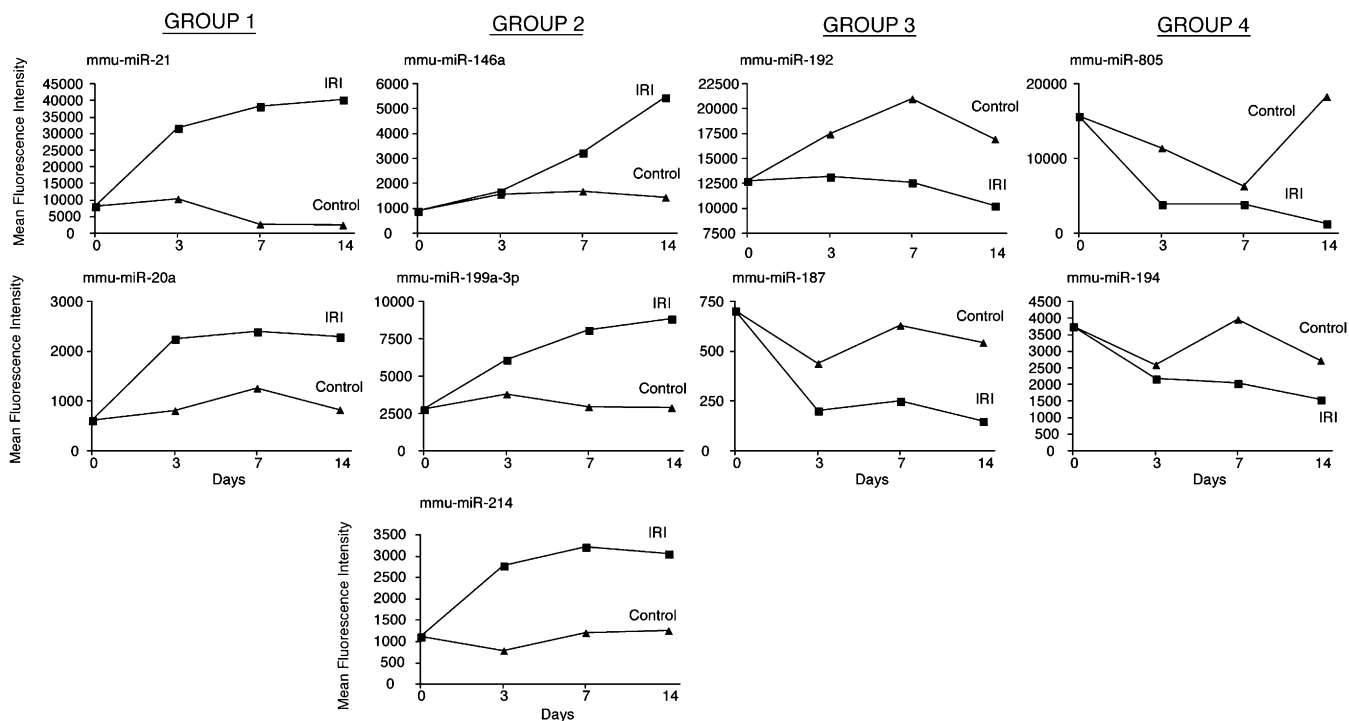

Fig. 54. miRNA microarray analysis in  $R_0/C_{T_0}$  mice following IRI. The expression of miR-21, miR-20a, miR-146a, miR-199a-3p, miR-214, miR-192, miR-187, miR-805, and miR-194 were analyzed over a 14-d time course by miRNA microarray in  $R^0/C_{T^0}$  mice. Experiments were performed with different samples than those used in Fig. 2 for real-time PCR analysis.

Table S1. Statistical analysis of miRNAs in mice undergoing IRI

| Reporter name   | P value  | Day 1<br>Mean | Day 3<br>Mean | Day 5<br>Mean | Day 7<br>Mean | Day 14<br>Mean | Day 21<br>Mean | Day 30<br>Mean |
|-----------------|----------|---------------|---------------|---------------|---------------|----------------|----------------|----------------|
| mmu-miR-709     | 0.00E+00 | 1,109         | 22,293        | 18,378        | 26,202        | 28,674         | 28,414         | 21,547         |
| mmu-miR-23a     | 0.00E+00 | 7,163         | 6,895         | 6,681         | 9,968         | 8,786          | 13,241         | 10,734         |
| mmu-miR-805     | 0.00E+00 | 11,063        | 7,580         | 7,457         | 3,484         | 1,714          | 3,403          | 1,928          |
| mmu-miR-98      | 0.00E+00 | 7,250         | 6,276         | 8,064         | 1,616         | 3,930          | 4,436          | 5,446          |
| mmu-miR-30b     | 0.00E+00 | 8,362         | 5,913         | 4,649         | 6,933         | 5,170          | 6,222          | 5,838          |
| mmu-miR-199a-3p | 0.00E+00 | 1,437         | 2,641         | 2,699         | 4,141         | 5,987          | 4,791          | 7,465          |
| mmu-miR-125b-5p | 0.00E+00 | 2,791         | 2,677         | 2,632         | 3,752         | 3,405          | 4,389          | 5,637          |
| mmu-miR-192     | 0.00E+00 | 5,893         | 3,192         | 4,548         | 3,301         | 2,159          | 2,899          | 1,406          |
| mmu-miR-146a    | 0.00E+00 | 416           | 637           | 596           | 908           | 2,369          | 2,168          | 4,449          |
| mmu-miR-145     | 0.00E+00 | 2,013         | 1,324         | 1,863         | 1,840         | 1,875          | 4,741          | 2,595          |
| mmu-miR-196a    | 0.00E+00 | 4,691         | 2,758         | 3,607         | 1,379         | 2,540          | 2,062          | 2,567          |
| mmu-miR-214     | 0.00E+00 | 437           | 1,759         | 1,879         | 2,408         | 3,899          | 3,206          | 1,872          |
| mmu-miR-195     | 0.00E+00 | 4,193         | 2,508         | 2,366         | 2,139         | 2,789          | 2,748          | 3,106          |
| mmu-miR-200a    | 0.00E+00 | 3,967         | 1,454         | 2,355         | 710           | 833            | 581            | 631            |
| mmu-miR-762     | 0.00E+00 | 408           | 2,100         | 1,830         | 1,635         | 2,567          | 2,623          | 1,605          |
| mmu-miR-429     | 0.00E+00 | 2,754         | 1,430         | 1,499         | 1,154         | 898            | 607            | 607            |
| mmu-miR-320     | 0.00E+00 | 957           | 1,262         | 1,492         | 1,191         | 1,326          | 1,325          | 1,239          |
| mmu-miR-689     | 0.00E+00 | 109           | 709           | 544           | 431           | 2,176          | 1,825          | 784            |
| mmu-miR-151-5p  | 0.00E+00 | 725           | 1,344         | 1,010         | 1,577         | 1,422          | 1,356          | 1,336          |
| mmu-miR-155     | 0.00E+00 | 1,905         | 1,125         | 1,887         | 456           | 940            | 655            | 1,304          |
| mmu-miR-705     | 0.00E+00 | 698           | 1,258         | 1,035         | 593           | 1,384          | 1,869          | 901            |
| mmu-miR-1224    | 0.00E+00 | 247           | 811           | 941           | 757           | 1,490          | 1,823          | 360            |
| mmu-miR-423—5p  | 0.00E+00 | 306           | 726           | 556           | 800           | 682            | 593            | 525            |
| mmu-miR-194     | 0.00E+00 | 1,520         | 1,195         | 1,457         | 1,655         | 664            | 633            | 579            |
| mmu-miR-29c     | 0.00E+00 | 1,539         | 1,053         | 521           | 782           | 542            | 382            | 459            |
| mmu-miR-25      | 0.00E+00 | 909           | 984           | 1,052         | 1,557         | 1,330          | 930            | 1,184          |
| mmu-miR-150     | 0.00E+00 | 221           | 326           | 208           | 417           | 581            | 630            | 1,142          |
| mmu-miR-30e     | 0.00E+00 | 1,271         | 761           | 788           | 712           | 418            | 421            | 407            |
| mmu-miR-146b    | 0.00E+00 | 49            | 71            | 108           | 173           | 780            | 558            | 895            |
| mmu-miR-218     | 0.00E+00 | 976           | 498           | 163           | 363           | 591            | 526            | 377            |
| mmu-miR-99b     | 0.00E+00 | 310           | 505           | 475           | 723           | 400            | 621            | 602            |
| mmu-miR-181a    | 0.00E+00 | 265           | 229           | 289           | 297           | 378            | 473            | 683            |
| mmu-miR-451     | 0.00E+00 | 753           | 178           | 130           | 210           | 54             | 53             | 104            |
| mmu-miR-132     | 0.00E+00 | 211           | 394           | 263           | 448           | 608            | 631            | 393            |
| mmu-miR-720     | 0.00E+00 | 626           | 259           | 480           | 355           | 158            | 563            | 302            |
| mmu-miR-574-5p  | 0.00E+00 | 119           | 313           | 290           | 260           | 355            | 453            | 152            |
| mmu-miR-92b     | 0.00E+00 | 387           | 332           | 340           | 532           | 319            | 272            | 447            |
| mmu-miR-23b     | 1.11E-16 | 9,193         | 8,386         | 8,000         | 11,620        | 10,335         | 14,869         | 12,211         |
| mmu-miR-27b     | 1.11E-16 | 2,622         | 2,905         | 1,931         | 3,553         | 3,955          | 2,950          | 4,046          |
| mmu-miR-185     | 1.11E-16 | 703           | 669           | 773           | 572           | 338            | 430            | 415            |
| mmu-miR-26b     | 3.33E-16 | 16,436        | 12,378        | 12,069        | 10,258        | 13,249         | 13,599         | 13,697         |
| mmu-miR-690     | 4.44E-16 | 674           | 1,651         | 865           | 1,500         | 696            | 582            | 980            |
| mmu-miR-22      | 5.55E-16 | 396           | 426           | 501           | 456           | 223            | 205            | 322            |
| mmu-miR-203     | 1.44E-15 | 1,135         | 466           | 336           | 305           | 456            | 579            | 340            |
| mmu-miR-125a-5p | 1.78E-15 | 4,636         | 4,583         | 3,447         | 7,090         | 5,139          | 6,045          | 6,789          |
| mmu-miR-103     | 5.55E-15 | 1,440         | 920           | 1,239         | 781           | 709            | 847            | 1,022          |
| mmu-miR-107     | 9.66E-15 | 1,411         | 858           | 1,174         | 696           | 643            | 771            | 929            |
| mmu-miR-378     | 1.02E-14 | 540           | 333           | 513           | 323           | 205            | 243            | 259            |
| mmu-miR-27a     | 2.38E-14 | 2,077         | 2,082         | 1,530         | 2,977         | 2,456          | 2,040          | 2,554          |
| mmu-miR-30c     | 3.76E-14 | 9,500         | 8,434         | 6,296         | 10,965        | 6,776          | 7,972          | 7,504          |
| mmu-miR-15a     | 8.64E-14 | 1,912         | 1,153         | 957           | 1,224         | 1,299          | 922            | 692            |
| mmu-miR-191     | 2.12E-13 | 1,882         | 1,819         | 2,531         | 2,660         | 1,661          | 1,965          | 2,286          |
| mmu-miR-92a     | 3.36E-12 | 1,278         | 1,210         | 1,159         | 1,577         | 1,073          | 904            | 1,395          |
| mmu-miR-20a     | 3.44E-12 | 492           | 539           | 650           | 466           | 570            | 343            | 344            |
| mmu-miR-126-3p  | 4.80E-12 | 10,719        | 8,909         | 6,266         | 8,602         | 8,024          | 7,362          | 5,440          |
| mmu-miR-222     | 6.54E-12 | 762           | 833           | 777           | 612           | 522            | 485            | 673            |
| mmu-miR-143     | 9.12E-12 | 1,270         | 1,391         | 1,405         | 1,633         | 1,468          | 1,326          | 2,085          |
| mmu-miR-30a     | 1.52E-11 | 2,819         | 1,936         | 2,316         | 2,419         | 1,718          | 1,982          | 1,780          |
| mmu-miR-200b    | 1.80E-11 | 10,060        | 7,121         | 7,187         | 6,967         | 6,826          | 5,446          | 4,618          |
| mmu-miR-24      | 2.63E-11 | 1,858         | 2,296         | 2,600         | 3,055         | 2,742          | 2,163          | 3,553          |
| mmu-miR-221     | 3.79E-11 | 566           | 631           | 824           | 476           | 692            | 535            | 726            |
| mmu-miR-29a     | 1.09E-10 | 4,608         | 3,888         | 3,095         | 4,840         | 3,200          | 2,691          | 3,198          |

**Table S1. Cont.**

| Reporter name | P value  | Day 1<br>Mean | Day 3<br>Mean | Day 5<br>Mean | Day 7<br>Mean | Day 14<br>Mean | Day 21<br>Mean | Day 30<br>Mean |
|---------------|----------|---------------|---------------|---------------|---------------|----------------|----------------|----------------|
| mmu-miR-21    | 1.55E-10 | 19,453        | 33,009        | 30,524        | 34,893        | 37,621         | 26,089         | 23,919         |
| mmu-let-7b    | 1.97E-10 | 26,294        | 29,194        | 33,299        | 23,445        | 23,907         | 21,606         | 26,554         |
| mmu-miR-15b   | 4.63E-10 | 3,050         | 4,706         | 3,150         | 3,904         | 3,977          | 2,654          | 2,836          |
| mmu-miR-152   | 8.98E-10 | 412           | 336           | 321           | 303           | 484            | 413            | 545            |
| mmu-let-7a    | 1.38E-09 | 36,092        | 38,557        | 43,822        | 31,361        | 32,859         | 29,552         | 34,676         |
| mmu-miR-10a   | 1.87E-09 | 6,677         | 7,029         | 5,847         | 9,648         | 9,466          | 9,099          | 7,513          |
| mmu-let-7c    | 2.09E-09 | 27,942        | 32,467        | 36,364        | 26,886        | 26,328         | 24,226         | 28,830         |
| mmu-let-7e    | 2.38E-09 | 19,187        | 20,552        | 23,369        | 12,856        | 16,427         | 16,349         | 17,749         |
| mmu-let-7d    | 5.01E-09 | 28,282        | 32,261        | 36,546        | 25,863        | 26,045         | 23,969         | 27,740         |
| mmu-miR-10b   | 1.01E-08 | 8,950         | 9,373         | 7,069         | 11,054        | 11,770         | 11,474         | 9,974          |
| mmu-miR-361   | 3.05E-08 | 851           | 978           | 932           | 985           | 1,121          | 917            | 1,083          |
| mmu-miR-200c  | 3.41E-08 | 2,305         | 2,376         | 1,768         | 2,061         | 2,360          | 1,985          | 1,615          |
| mmu-miR-674   | 1.71E-07 | 204           | 258           | 441           | 249           | 259            | 235            | 296            |
| mmu-let-7i    | 2.62E-05 | 9,154         | 8,906         | 10,390        | 8,975         | 11,846         | 9,538          | 11,113         |
| mmu-miR-30d   | 4.89E-05 | 2,156         | 1,502         | 1,747         | 1,663         | 1,380          | 1,636          | 1,614          |
| mmu-miR-93    | 1.69E-04 | 168           | 159           | 365           | 334           | 226            | 159            | 172            |
| mmu-miR-16    | 1.18E-03 | 8,383         | 6,226         | 6,795         | 7,869         | 7,613          | 6,583          | 6,689          |
| mmu-miR-26a   | 8.10E-02 | 20,476        | 19,434        | 20,148        | 20,569        | 21,205         | 21,355         | 21,275         |
| mmu-let-7g    | 9.20E-02 | 15,219        | 14,422        | 14,551        | 13,388        | 14,488         | 12,921         | 13,349         |

Genome-wide miRNA expression profiling using  $\mu$ Paraflo microfluidic biochip array technology was conducted on RNA prepared from kidneys at the indicated timepoints following induction of IRI. Based on genome-wide miRNA expression profiling of 570 miRNAs present in miRBase 10.0, significant changes were detected in the expression of 81 miRNAs in IRI samples over the time course (ANOVA,  $P < 0.01$ ). Only miRs achieving a signal intensity  $\geq 200$  over the time course were considered for analysis.

Table S2. Statistical analysis of miRNAs in sham controls

| Reporter name   | P value  | Day 1  | Day 3  | Day 5  | Day 7  | Day 14 | Day 21 | Day 30 |
|-----------------|----------|--------|--------|--------|--------|--------|--------|--------|
|                 |          | Mean   |
| mmu-miR-709     | 0.00E+00 | 17,677 | 12,406 | 22,950 | 17,998 | 25,764 | 26,733 | 50,611 |
| mmu-miR-26a     | 0.00E+00 | 21,995 | 22,608 | 19,444 | 23,117 | 20,004 | 17,423 | 11,973 |
| mmu-miR-805     | 0.00E+00 | 15,836 | 13,565 | 12,817 | 9,151  | 16,507 | 17,307 | 20,212 |
| mmu-miR-23b     | 0.00E+00 | 7,636  | 8,073  | 9,092  | 10,185 | 17,314 | 15,108 | 10,825 |
| mmu-miR-26b     | 0.00E+00 | 15,596 | 14,393 | 8,208  | 9,436  | 12,570 | 10,993 | 6,639  |
| mmu-miR-30c     | 0.00E+00 | 7,190  | 10,585 | 12,939 | 14,121 | 9,565  | 11,985 | 5,115  |
| mmu-miR-23a     | 0.00E+00 | 5,039  | 6,071  | 6,777  | 7,251  | 13,989 | 12,213 | 8,257  |
| mmu-miR-126-3p  | 0.00E+00 | 6,408  | 9,445  | 7,976  | 10,811 | 9,735  | 6,526  | 4,514  |
| mmu-miR-10b     | 0.00E+00 | 8,124  | 10,044 | 8,106  | 10,656 | 7,139  | 7,168  | 3,914  |
| mmu-miR-21      | 0.00E+00 | 4,287  | 8,829  | 4,587  | 8,360  | 3,644  | 3,359  | 2,959  |
| mmu-miR-145     | 0.00E+00 | 876    | 1,148  | 1,991  | 1,686  | 4,587  | 5,688  | 8,748  |
| mmu-miR-125a-5p | 0.00E+00 | 4,880  | 4,543  | 8,399  | 5,977  | 2,952  | 3,425  | 1,896  |
| mmu-miR-10a     | 0.00E+00 | 5,730  | 7,477  | 5,853  | 7,773  | 4,749  | 5,016  | 2,819  |
| mmu-miR-30b     | 0.00E+00 | 5,359  | 6,746  | 7,362  | 5,739  | 4,949  | 6,076  | 3,216  |
| mmu-miR-98      | 0.00E+00 | 5,668  | 6,285  | 5,494  | 1,168  | 3,980  | 4,486  | 6,020  |
| mmu-miR-29a     | 0.00E+00 | 2,709  | 4,819  | 4,399  | 6,806  | 4,315  | 4,067  | 4,306  |
| mmu-miR-762     | 0.00E+00 | 736    | 1,185  | 6,314  | 567    | 2,027  | 2,698  | 1,665  |
| mmu-miR-125b-5p | 0.00E+00 | 2,753  | 2,545  | 5,647  | 2,883  | 2,074  | 2,164  | 2,375  |
| mmu-miR-24      | 0.00E+00 | 2,200  | 2,194  | 1,957  | 3,488  | 2,425  | 2,605  | 3,205  |
| mmu-miR-320     | 0.00E+00 | 2,488  | 1,270  | 1,043  | 1,513  | 1,732  | 1,951  | 2,956  |
| mmu-miR-200a    | 0.00E+00 | 5,594  | 4,081  | 1,332  | 1,542  | 1,986  | 1,865  | 2,597  |
| mmu-miR-191     | 0.00E+00 | 3,513  | 1,909  | 2,467  | 2,943  | 1,754  | 2,000  | 2,289  |
| mmu-miR-195     | 0.00E+00 | 3,878  | 2,847  | 2,059  | 1,773  | 1,812  | 1,520  | 1,303  |
| mmu-miR-143     | 0.00E+00 | 1,601  | 1,505  | 1,257  | 2,330  | 1,605  | 1,461  | 1,687  |
| mmu-miR-122     | 0.00E+00 | 19     | 19     | 12     | 21     | 22     | 20     | 3,571  |
| mmu-miR-103     | 0.00E+00 | 1,523  | 1,277  | 943    | 1,241  | 1,593  | 1,666  | 1,996  |
| mmu-miR-705     | 0.00E+00 | 2,020  | 799    | 1,769  | 290    | 1,576  | 2,347  | 2,787  |
| mmu-miR-107     | 0.00E+00 | 1,474  | 1,244  | 920    | 1,108  | 1,567  | 1,595  | 1,777  |
| mmu-miR-690     | 0.00E+00 | 1,682  | 1,222  | 371    | 964    | 1,012  | 338    | 2,318  |
| mmu-miR-214     | 0.00E+00 | 552    | 412    | 656    | 811    | 825    | 1,912  | 2,404  |
| mmu-miR-378     | 0.00E+00 | 1,065  | 437    | 327    | 411    | 566    | 476    | 542    |
| mmu-miR-1224    | 0.00E+00 | 1,082  | 829    | 2,390  | 330    | 1,353  | 2,013  | 484    |
| mmu-miR-27a     | 0.00E+00 | 1,222  | 1,947  | 1,161  | 1,940  | 1,630  | 1,312  | 662    |
| mmu-miR-185     | 0.00E+00 | 918    | 771    | 672    | 915    | 776    | 766    | 855    |
| mmu-miR-720     | 0.00E+00 | 553    | 387    | 466    | 661    | 1,171  | 808    | 1,521  |
| mmu-miR-467b*   | 0.00E+00 | 329    | 50     | 1,878  | 38     | 65     | 37     | 211    |
| mmu-miR-15a     | 0.00E+00 | 829    | 1,564  | 661    | 842    | 612    | 445    | 227    |
| mmu-miR-15b     | 0.00E+00 | 1,315  | 1,504  | 1,470  | 1,828  | 1,325  | 1,279  | 1,233  |
| mmu-miR-151-5p  | 0.00E+00 | 607    | 1,036  | 1,033  | 1,762  | 1,027  | 979    | 624    |
| mmu-miR-689     | 0.00E+00 | 757    | 430    | 1,522  | 65     | 1,530  | 823    | 139    |
| mmu-miR-29c     | 0.00E+00 | 394    | 1,533  | 640    | 1,171  | 954    | 805    | 455    |
| mmu-miR-423-5p  | 0.00E+00 | 636    | 435    | 442    | 987    | 646    | 1,105  | 930    |
| mmu-miR-199a-3p | 0.00E+00 | 887    | 1,199  | 500    | 1,441  | 1,373  | 1,182  | 1,180  |
| mmu-miR-466f-3p | 0.00E+00 | 1,357  | 60     | 980    | 25     | 85     | 81     | 198    |
| mmu-miR-467a*   | 0.00E+00 | 121    | 20     | 1,179  | 21     | 31     | 29     | 66     |
| mmu-miR-574-5p  | 0.00E+00 | 1,110  | 88     | 383    | 37     | 133    | 157    | 226    |
| mmu-miR-92a     | 0.00E+00 | 543    | 770    | 1,001  | 1,013  | 767    | 826    | 938    |
| mmu-miR-451     | 0.00E+00 | 197    | 204    | 232    | 406    | 308    | 324    | 882    |
| mmu-miR-30a*    | 0.00E+00 | 262    | 519    | 408    | 538    | 307    | 207    | 148    |
| mmu-miR-455     | 0.00E+00 | 366    | 284    | 946    | 385    | 282    | 400    | 498    |
| mmu-miR-203     | 0.00E+00 | 358    | 781    | 368    | 401    | 777    | 657    | 426    |
| mmu-miR-22      | 0.00E+00 | 406    | 532    | 685    | 843    | 559    | 400    | 580    |
| mmu-miR-99b     | 0.00E+00 | 401    | 431    | 667    | 768    | 389    | 571    | 407    |
| mmu-miR-466g    | 0.00E+00 | 740    | 27     | 333    | 18     | 36     | 37     | 50     |
| mmu-miR-574-3p  | 0.00E+00 | 752    | 57     | 280    | 25     | 62     | 73     | 97     |
| mmu-miR-486     | 0.00E+00 | 116    | 111    | 180    | 400    | 238    | 405    | 662    |
| mmu-miR-155     | 0.00E+00 | 616    | 529    | 209    | 138    | 358    | 323    | 410    |
| mmu-miR-218     | 0.00E+00 | 102    | 537    | 137    | 372    | 264    | 173    | 40     |
| mmu-miR-30e     | 1.11E-16 | 810    | 1,379  | 746    | 1,222  | 935    | 701    | 600    |
| mmu-let-7c      | 6.66E-16 | 36,954 | 31,674 | 35,443 | 37,526 | 36,985 | 36,603 | 47,340 |
| mmu-miR-25      | 2.89E-15 | 262    | 531    | 507    | 716    | 443    | 547    | 407    |
| mmu-miR-222     | 7.33E-15 | 889    | 733    | 547    | 843    | 763    | 955    | 808    |

Table S2. Cont.

| Reporter name | P value  | Day 1  | Day 3  | Day 5  | Day 7  | Day 14 | Day 21 | Day 30 |
|---------------|----------|--------|--------|--------|--------|--------|--------|--------|
|               |          | Mean   |
| mmu-let-7b    | 5.11E-14 | 36,380 | 29,218 | 32,994 | 32,780 | 34,324 | 36,108 | 44,812 |
| mmu-miR-361   | 5.34E-14 | 815    | 875    | 665    | 980    | 895    | 919    | 682    |
| mmu-let-7a    | 1.21E-13 | 36,983 | 35,479 | 37,263 | 39,649 | 39,457 | 36,942 | 46,022 |
| mmu-let-7e    | 1.36E-13 | 20,795 | 18,531 | 17,797 | 10,134 | 16,269 | 19,496 | 20,166 |
| mmu-miR-194   | 1.75E-13 | 1,388  | 1,967  | 1,824  | 2,895  | 1,656  | 1,542  | 1,671  |
| mmu-miR-429   | 3.36E-13 | 2,419  | 2,271  | 1,432  | 1,416  | 1,463  | 1,275  | 1,518  |
| mmu-miR-196a  | 8.46E-13 | 3,135  | 3,244  | 1,953  | 1,312  | 2,871  | 3,576  | 3,050  |
| mmu-miR-221   | 1.63E-12 | 555    | 621    | 401    | 469    | 752    | 668    | 719    |
| mmu-miR-27b   | 2.10E-12 | 2,460  | 3,473  | 2,470  | 3,561  | 3,273  | 2,610  | 2,470  |
| mmu-miR-200b  | 1.02E-11 | 10,050 | 10,665 | 8,001  | 7,422  | 7,277  | 8,619  | 6,696  |
| mmu-miR-16    | 7.01E-11 | 7,114  | 7,328  | 7,138  | 6,841  | 5,520  | 5,609  | 5,206  |
| mmu-let-7i    | 7.52E-11 | 7,614  | 7,074  | 5,422  | 4,997  | 5,238  | 4,591  | 6,608  |
| mmu-miR-674   | 9.41E-11 | 252    | 204    | 145    | 343    | 211    | 267    | 360    |
| mmu-let-7d    | 1.60E-10 | 34,213 | 31,011 | 33,243 | 32,501 | 34,288 | 34,006 | 42,463 |
| mmu-miR-192   | 3.00E-10 | 7,150  | 5,440  | 4,343  | 6,282  | 6,484  | 5,558  | 5,119  |
| mmu-miR-30a   | 9.73E-09 | 2,471  | 3,021  | 2,464  | 3,406  | 2,939  | 2,740  | 2,536  |
| mmu-miR-146a  | 8.88E-08 | 463    | 486    | 365    | 473    | 612    | 426    | 374    |
| mmu-miR-93    | 6.39E-07 | 118    | 135    | 197    | 301    | 121    | 138    | 136    |
| mmu-miR-200c  | 1.98E-06 | 1,949  | 2,555  | 1,961  | 2,077  | 1,879  | 2,179  | 1,820  |
| mmu-miR-152   | 3.88E-06 | 383    | 419    | 227    | 328    | 350    | 227    | 238    |
| mmu-let-7g    | 5.16E-06 | 14,865 | 16,141 | 13,150 | 16,149 | 15,653 | 13,224 | 12,632 |
| mmu-miR-30d   | 1.50E-05 | 2,038  | 2,037  | 1,843  | 2,212  | 2,393  | 2,362  | 2,759  |

Genome-wide miRNA expression profiling using  $\mu$ Parafluo microfluidic biochip array technology was conducted on RNA prepared from kidneys at the indicated time points following sham surgery. Based on genome-wide miRNA expression profiling of 570 miRNAs present in miRBase 10.0, significant changes were detected in the expression of 84 miRNAs in IRI samples over the time course (ANOVA  $P < 0.01$ ). Only miRs achieving a signal intensity  $\geq 200$  over the time course were considered for analysis.
